# Supplementary material for: Evaluation of Mac-2 binding protein glycosylation isomer (M2BPGi) as a diagnostic marker for staging liver fibrosis: a meta-analysis
Source: PeerJ journal article supplement (doi:10.7717/peerj.17611), 2024-06-25
Supplement: Supplementary_materials_1_Data_for_analysis.xlsx [file Supplementary_materials_1_Data_for_analysis.xlsx]

## Sheet: F1
Stduy	Cut-off	tp	fp	fn	tn
Yamada et al.(2019)	0.98	30	11	21	54
Nah et al.(2020)	0.42	140	23	53	20
Tsuji et al.(2020)	0.89	37	0	34	25
Kimura et al.(2020)	1.13	72	6	112	43
Jang et al.(2021)	0.54	62	4	32	15
Cheng et al.(2021)	0.6	62	59	39	66
Jang et al.(2021)	1.5	15	2	43	20

## Sheet: F2
Stduy	Cut-off	tp	fp	fn	tn
Xu et al.(2017)	0.945	181	134	62	303
Wei et al.(2017)	1.12	73	34	28	93
Noguchi et al.(2017)	0.81	18	17	18	17
Ueno et al.(2018)	1.59	13	0	8	16
Moon et al.(2018)	0.71	28	11	16	118
Jekarl et al.(2018)	0.7	29	28	28	66
Yamada et al.(2019)	1.02	14	23	8	71
Nah et al.(2020)	0.59	24	73	10	129
Tsuji et al.(2020)	0.89	25	12	2	57
Ueda et al.(2020)	1.63	68	5	24	11
Kimura et al.(2020)	1.15	30	46	23	134
Jang et al.(2021)	0.65	42	8	18	45
Cheng et al.(2021)	0.68	11	88	3	124
Sasaki et al.(2021)	1.08	35	14	10	35
Numao et al.(2021)	2.2	51	11	26	53
Fujinaga et al.(2021)	0.85	17	30	6	49
Jang et al.(2021)	1.63	9	6	20	45
Hur et al.(2022)	1	32	59	3	59
Hur et al.(2022)	3	34	117	1	0

## Sheet: F3
Stduy	Cut-off	tp	fp	fn	tn
Noguchi et al.(2017)	0.82	17	18	2	33
Ueno et al.(2018)	1.67	12	0	3	22
Matsuura et al.(2018)	2.66	23	3	19	37
Moon et al.(2018)	0.71	19	20	9	125
Jekarl et al.(2018)	0.7	11	51	4	85
Umetsu et al.(2018)	5.32	6	0	1	21
Mak et al.(2019)	0.605	50	33	30	127
Yamada et al.(2019)	1.04	6	29	0	81
Nah et al.(2020)	0.75	8	50	2	176
Tsuji et al.(2020)	0.77	13	30	0	53
Ueda et al.(2020)	2.15	37	21	19	31
Kim et al.(2020)	1.08	82	24	11	127
Kim et al.ura(2020)	1.16	9	66	5	153
Jang et al.(2021)	0.71	28	17	5	63
Numao et al.(2021)	2.99	38	6	12	85
Jang et al.(2021)	1.37	9	14	3	54
Hur et al.(2022)	1	8	10	8	126
Hur et al.(2022)	3	3	2	13	134

## Sheet: F4
Stduy	Cut-off	tp	fp	fn	tn
Yamada et al.(2016)	3.53	47	1	4	12
Xu et al.(2017)	1.355	59	131	9	481
Wei et al.(2017)	1.825	38	10	31	149
Ueno et al.(2018)	1.84	10	1	1	25
Matsuura et al.(2018)	2.66	16	10	7	49
Mak et al.(2019)	0.615	39	43	14	144
Tsuji et al.(2020)	0.77	3	40	0	53
Ueda et al.(2020)	2.7	13	35	4	56
Jang et al.(2021)	0.9	12	23	1	77
Numao et al.(2021)	2.99	21	22	3	95
Mak et al.(2022)	1.265	43	14	34	52

## Sheet: Sheet1
Stduy	Cut-off	tp	fp	fn	tn
Yamada et al.(2019)	0.98	30	11	21	54
Nah et al.(2020)	0.42	140	23	53	20
Tsuji et al.(2020)	0.89	37	0	34	25
Kimura et al.(2020)	1.13	72	6	112	43
Jang et al.(2021)	0.54	62	4	32	15
Cheng et al.(2021)	0.6	62	59	39	66
Jang et al.(2021)	1.5	15	2	43	20
Xu et al.(2017)	0.945	181	134	62	303
Wei et al.(2017)	1.12	73	34	28	93
Noguchi et al.(2017)	0.81	18	17	18	17
Ueno et al.(2018)	1.59	13	0	8	16
Moon et al.(2018)	0.71	28	11	16	118
Jekarl et al.(2018)	0.7	29	28	28	66
Yamada et al.(2019)	1.02	14	23	8	71
Nah et al.(2020)	0.59	24	73	10	129
Tsuji et al.(2020)	0.89	25	12	2	57
Ueda et al.(2020)	1.63	68	5	24	11
Kimura et al.(2020)	1.15	30	46	23	134
Jang et al.(2021)	0.65	42	8	18	45
Cheng et al.(2021)	0.68	11	88	3	124
Sasaki et al.(2021)	1.08	35	14	10	35
Numao et al.(2021)	2.2	51	11	26	53
Fujinaga et al.(2021)	0.85	17	30	6	49
Jang et al.(2021)	1.63	9	6	20	45
Hur et al.(2022)	1	32	59	3	59
Hur et al.(2022)	3	34	117	1	0
Noguchi et al.(2017)	0.82	17	18	2	33
Ueno et al.(2018)	1.67	12	0	3	22
Matsuura et al.(2018)	2.66	23	3	19	37
Moon et al.(2018)	0.71	19	20	9	125
Jekarl et al.(2018)	0.7	11	51	4	85
Umetsu et al.(2018)	5.32	6	0	1	21
Mak et al.(2019)	0.605	50	33	30	127
Yamada et al.(2019)	1.04	6	29	0	81
Nah et al.(2020)	0.75	8	50	2	176
Tsuji et al.(2020)	0.77	13	30	0	53
Ueda et al.(2020)	2.15	37	21	19	31
Kim et al.(2020)	1.08	82	24	11	127
Kim et al.ura(2020)	1.16	9	66	5	153
Jang et al.(2021)	0.71	28	17	5	63
Numao et al.(2021)	2.99	38	6	12	85
Jang et al.(2021)	1.37	9	14	3	54
Hur et al.(2022)	1	8	10	8	126
Hur et al.(2022)	3	3	2	13	134
Yamada et al.(2016)	3.53	47	1	4	12
Xu et al.(2017)	1.355	59	131	9	481
Wei et al.(2017)	1.825	38	10	31	149
Ueno et al.(2018)	1.84	10	1	1	25
Matsuura et al.(2018)	2.66	16	10	7	49
Mak et al.(2019)	0.615	39	43	14	144
Tsuji et al.(2020)	0.77	3	40	0	53
Ueda et al.(2020)	2.7	13	35	4	56
Jang et al.(2021)	0.9	12	23	1	77
Numao et al.(2021)	2.99	21	22	3	95
Mak et al.(2022)	1.265	43	14	34	52
