# Supplementary material for: Evaluation of Mac-2 binding protein glycosylation isomer (M2BPGi) as a diagnostic marker for staging liver fibrosis: a meta-analysis
Source: PeerJ journal article supplement (doi:10.7717/peerj.17611), 2024-06-25
Supplement: Supplementary_materials_2_Stata_codes.docx [file Supplementary_materials_2_Stata_codes.docx]

Supplementary materials 2: In Stata, the codes of bivariate mixed-effects model for diagnostic meta-analysis

1. Load package

ssc install midas, replace

ssc install mylabels, replace

2. Meta-analysis and result output

midas tp fp fn tn,res(all)

3. Draw sensitivity and specificity forest plots

midas tp fp fn tn,texts(0.60) bfor(dss) id(Study) ford fors

4. Draw box diagram

midas tp fp fn tn, bivbox scheme(s2color)

5 Draw SRoc curve

midas tp fp fn tn, plot sroc(both)

6. Clinical applicability analysis

midas tp fp fn tn, pubbias

midas tp fp fn tn, fagan(0.5)
